# Supplementary material
Source: publisher figshare collection journal article supplement (https://acs.figshare.com/ndownloader/files/8201375)
Supplement: Supplementary file 1 [file 8201375]

**Supporting information for:**

**Molecular Dynamics Simulation of Water Transport Mechanisms  
through Nanoporous Boron Nitride and Graphene Multilayers**

**Majid Shahbabaei, and Daejoong Kim\***

Department of Mechanical Engineering, Sogang University, Seoul 121-742, Republic of Korea

[daejoong@sogang.ac.kr](mailto:daejoong@sogang.ac.kr)

Postal address: 35 Baekbeom-ro, Mapo-gu, Seoul, Republic of Korea, 121-742

Phone number: (+82) 2-705-8644

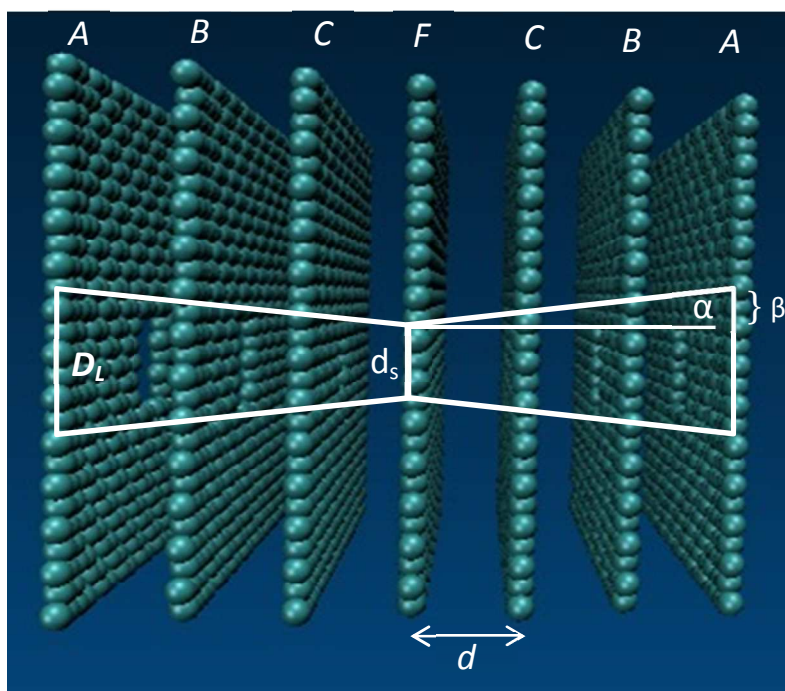

**Figure S1.** Schematic of an hourglass-shaped nanopore in multilayer structure. All the nanopore models are symmetrical with the same effective pore diameter in layers A, B, and C, respectively.  $D_L$ ,  $d_s$ ,  $d$  and  $\alpha$  are the largest diameter (constant at 8 Å), narrowest diameter (constant at 5 Å), interlayer distance, and the cone angle of hourglass-shaped structure, respectively. Using the relation  $\tan\alpha = \beta/d$ , the cone angle  $\alpha$  can be determined. Next, using the cone angle and changing the interlayer distance, the diameter of the pores located in layers B and C can be estimated.

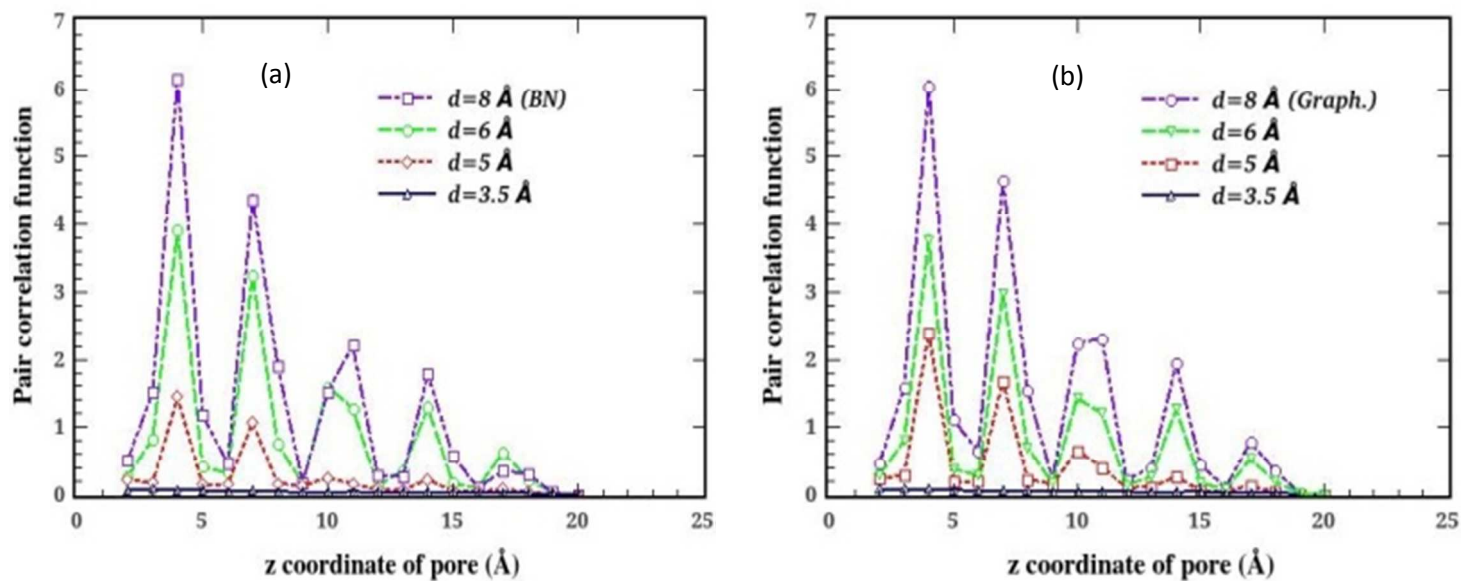

**Figure S2.** Pair correlation function of water molecules inside (a) boron nitride (BN) and (b) graphene with variation of layer separation.

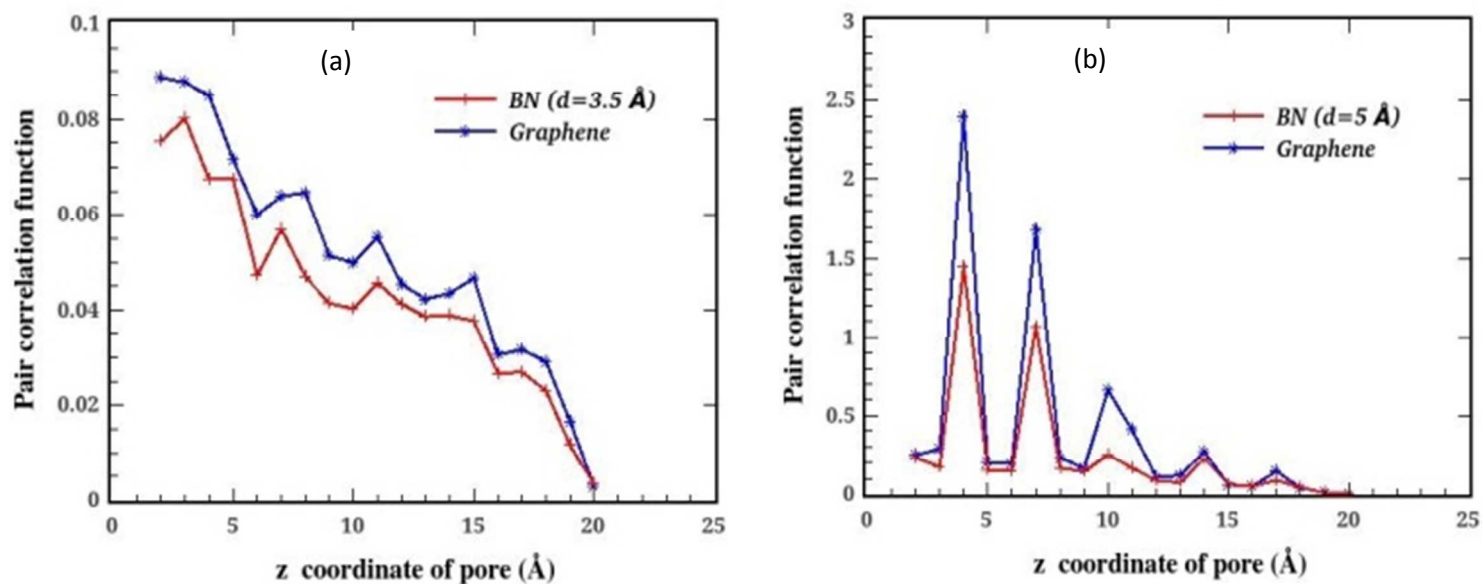

**Figure S3.** Pair correlation function of water molecules inside boron nitride (BN) and graphene with layer separation of (a) 3.5 Å and (b) 5 Å.

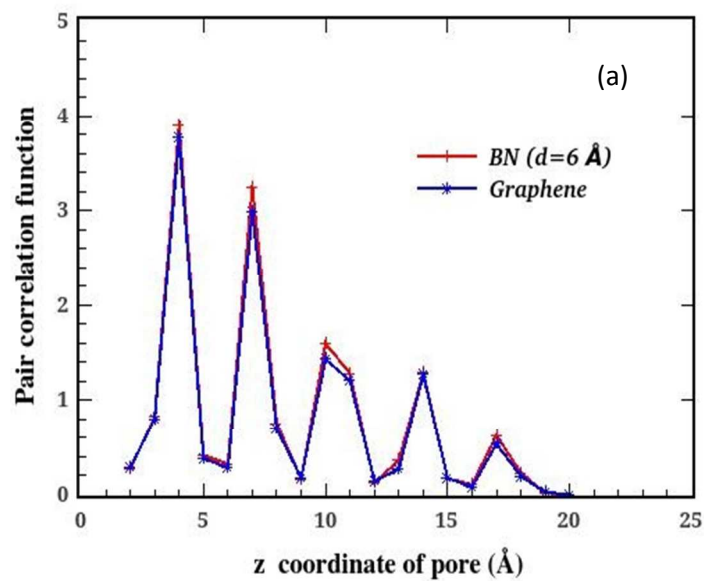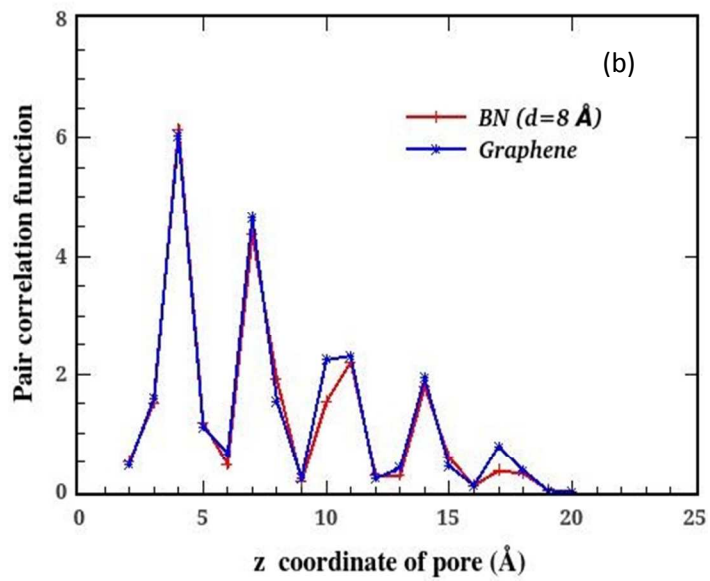

**Figure S4.** Pair correlation function of water molecules inside boron nitride (BN) and graphene with layer separation of (a) 6 Å and (b) 8 Å.
